# Supplementary material
Source: PubMed Central journal article supplement (PMC5348298)
Supplement: NIHMS762593-supplement-link_to_video_abstract.pdf [file NIHMS762593-supplement-link_to_video_abstract.pdf]

[http://wolterskluwer.http.internapcdn.net/wolterskluwer\\_vitalstream\\_com/MP4s/permalink/jnpt/a/jnpt\\_38\\_3\\_2014\\_04\\_10\\_winstein\\_jnpt-d-13-00106r2\\_sdc1.mp4](http://wolterskluwer.http.internapcdn.net/wolterskluwer_vitalstream_com/MP4s/permalink/jnpt/a/jnpt_38_3_2014_04_10_winstein_jnpt-d-13-00106r2_sdc1.mp4)
